# Supplementary material for: Time Characteristics of the Influence Radius by Injecting N2 to Displace Coalbed Methane: A Case Study
Source: Hindawi journal article supplement (doi:10.1155/2019/4176535), 2019-02-07
Supplement: f1 [file 4176535.f1.doc]

Raw on field test of influence radius by injecting N2 to displace coalbed methane in Shigang Coal Mine of the Qinshui Basin in China

**1 Test system**

A injecting N2 system consists of the connecting pipe, quick joint, borehole sealing device, high pressure switch, pressure gauge, etc., as shown in Fig. 1. The field test gas source is nitrogen, which is provided by the mine pressure duct road. The connecting lines are composed of 25-mm high-pressure pipes. The borehole sealing device uses hard PVC tube and polyurethane sealing, and borehole sealing pipe is connected by quick connectors.


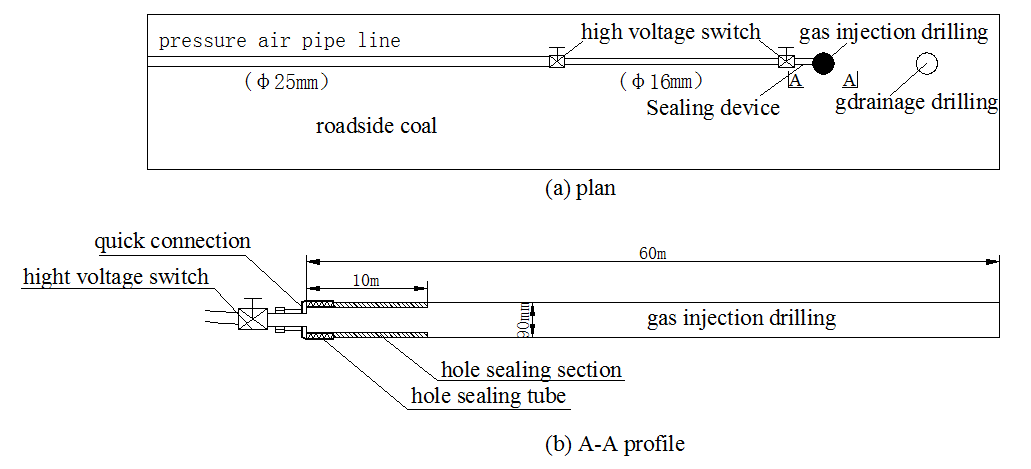


Fig.1 Diagram of gas injection

**2 Test of borehole arrangement**

The borehole arrangement is shown in Fig.2. The design of the borehole parameters is shown in Table 1.

Fig.2 Borehole arrangement in the effective gas injection radius test

Table 1 Borehole parameters in injecting N2 influence radius test

| borehole type | Specifications and sealing requirements of borehole | | | |
| --- | --- | --- | --- | --- |
| depth/m | diameter/mm | sealing depth/m | sealing method |
| N2 injection borehole | 60 | 94 | 10 | rigid PVC pipe + polyurethane entire section borehole sealing |
| Observation borehole | 60 | 94 | 10 | rigid PVC pipe +steel pipe+polyurethane borehole sealing |
| borehole spacing/m | *ri* =0.8, 1, 1.5, 2, 3 | | | |

3 Test result records

| Spacing from the injection hole for 0.8m in bedding direction | | | | |
| --- | --- | --- | --- | --- |
| Time（h） | Mixed gas flow（L/min） | density（%） | fure gas flow（L/min） | Remarks |
| 0.00 | 2.15 | 90.23 | 1.94 |  |
| 0.20 | 2.04 | 90.20 | 1.84 |  |
| 0.40 | 1.95 | 89.74 | 1.75 |  |
| 0.60 | 1.89 | 89.95 | 1.70 |  |
| 0.80 | 1.80 | 90.00 | 1.62 |  |
| 1.00 | 1.72 | 90.12 | 1.55 |  |
| 1.20 | 1.63 | 90.18 | 1.47 |  |
| 1.40 | 1.42 | 90.14 | 1.28 |  |
| 1.60 | 1.33 | 90.23 | 1.20 |  |
| 1.80 | 1.19 | 90.76 | 1.08 |  |
| 2.00 | 1.09 | 90.83 | 0.99 | start injectiong N2 |
| 2.20 | 7.29 | 70.23 | 5.12 |  |
| 2.40 | 10.31 | 65.57 | 6.76 |  |
| 2.60 | 11.02 | 62.16 | 6.85 |  |
| 2.80 | 11.36 | 61.00 | 6.93 |  |
| 3.00 | 11.93 | 58.42 | 6.97 |  |
| 3.20 | 11.69 | 59.28 | 6.93 |  |
| 3.40 | 11.85 | 56.62 | 6.71 |  |
| 3.60 | 11.52 | 56.42 | 6.50 |  |
| 3.80 | 11.85 | 55.78 | 6.61 |  |
| 4.00 | 11.69 | 55.77 | 6.52 |  |

| Spacing from the injection hole for 1.0m in bedding direction | | | | |
| --- | --- | --- | --- | --- |
| Time（h） | Mixed gas flow（L/min） | density（%） | fure gas flow（L/min） | Remarks |
| 0.00 | 2.67 | 99.25 | 2.65 |  |
| 0.20 | 2.50 | 97.60 | 2.44 |  |
| 0.40 | 2.30 | 97.83 | 2.25 |  |
| 0.60 | 2.10 | 95.24 | 2.00 |  |
| 0.80 | 1.90 | 94.74 | 1.80 |  |
| 1.00 | 1.80 | 94.44 | 1.70 |  |
| 1.20 | 1.75 | 94.29 | 1.65 |  |
| 1.40 | 1.60 | 87.50 | 1.40 |  |
| 1.60 | 1.60 | 87.50 | 1.40 |  |
| 1.80 | 1.60 | 87.50 | 1.40 |  |
| 2.00 | 1.60 | 87.50 | 1.40 | start injectiong N2 |
| 2.20 | 2.20 | 90.91 | 2.00 |  |
| 2.40 | 4.60 | 91.30 | 4.20 |  |
| 2.60 | 5.80 | 94.83 | 5.50 |  |
| 2.80 | 6.40 | 93.75 | 6.00 |  |
| 3.00 | 8.00 | 81.25 | 6.50 |  |
| 3.20 | 8.40 | 83.33 | 7.00 |  |
| 3.40 | 9.20 | 78.26 | 7.20 |  |
| 3.60 | 10.00 | 74.00 | 7.40 |  |
| 3.80 | 10.50 | 72.38 | 7.60 |  |
| 4.00 | 11.02 | 69.87 | 7.70 |  |
| 4.20 | 10.93 | 68.44 | 7.48 |  |
| 4.40 | 11.02 | 67.60 | 7.45 |  |
| 4.60 | 10.93 | 65.23 | 7.13 |  |
| 4.80 | 10.84 | 64.67 | 7.01 |  |
| 5.00 | 10.93 | 64.32 | 7.03 |  |
| 5.20 | 10.84 | 63.93 | 6.93 |  |
| 5.40 | 10.67 | 63.45 | 6.77 |  |
| 5.60 | 10.76 | 63.20 | 6.80 |  |

Spacing from the injection hole for 1.0m in vertical bedding direction

| Time（h） | Mixed gas flow（L/min） | density（%） | fure gas flow（L/min） | Remarks |
| --- | --- | --- | --- | --- |
| 0.00 | 2.80 | 99.29 | 2.78 |  |
| 0.20 | 2.60 | 98.85 | 2.57 |  |
| 0.40 | 2.70 | 98.15 | 2.65 |  |
| 0.60 | 2.50 | 98.00 | 2.45 |  |
| 0.80 | 2.40 | 97.08 | 2.33 |  |
| 1.00 | 2.20 | 96.82 | 2.13 |  |
| 1.20 | 1.90 | 96.32 | 1.83 |  |
| 1.40 | 1.70 | 95.88 | 1.63 |  |
| 1.60 | 1.60 | 95.00 | 1.52 |  |
| 1.80 | 1.50 | 94.67 | 1.42 |  |
| 2.00 | 1.50 | 94.00 | 1.41 | start injectiong N2 |
| 2.20 | 1.60 | 88.13 | 1.41 |  |
| 2.40 | 2.00 | 85.00 | 1.70 |  |
| 2.60 | 2.50 | 82.00 | 2.05 |  |
| 2.80 | 3.20 | 80.00 | 2.56 |  |
| 3.00 | 3.80 | 77.89 | 2.96 |  |
| 3.20 | 4.40 | 75.91 | 3.34 |  |
| 3.40 | 5.20 | 75.00 | 3.90 |  |
| 3.60 | 5.80 | 73.97 | 4.29 |  |
| 3.80 | 6.40 | 72.97 | 4.67 |  |
| 4.00 | 7.00 | 72.43 | 5.07 |  |
| 4.20 | 7.50 | 71.60 | 5.37 |  |
| 4.40 | 7.80 | 70.00 | 5.46 |  |
| 4.60 | 8.00 | 69.00 | 5.52 |  |
| 4.80 | 8.30 | 67.95 | 5.64 |  |
| 5.00 | 8.30 | 67.47 | 5.60 |  |
| 5.20 | 8.20 | 66.95 | 5.49 |  |
| 5.40 | 8.20 | 65.98 | 5.41 |  |
| 5.60 | 8.10 | 65.43 | 5.30 |  |
| 5.80 | 8.20 | 64.51 | 5.29 |  |
| 6.00 | 8.10 | 63.21 | 5.12 |  |

Spacing from the injection hole for 1.5m in bedding direction

| Time（h） | Mixed gas flow（L/min） | density（%） | fure gas flow（L/min） | Remarks |
| --- | --- | --- | --- | --- |
| 0.00 | 2.18 | 96.33 | 2.10 |  |
| 0.20 | 2.18 | 96.33 | 2.10 |  |
| 0.40 | 2.18 | 89.91 | 1.96 |  |
| 0.60 | 2.12 | 90.09 | 1.91 |  |
| 0.80 | 2.07 | 89.86 | 1.86 |  |
| 1.00 | 1.95 | 89.74 | 1.75 |  |
| 1.20 | 1.82 | 90.11 | 1.64 |  |
| 1.40 | 1.72 | 90.12 | 1.55 |  |
| 1.60 | 1.65 | 90.30 | 1.49 |  |
| 1.80 | 1.54 | 90.26 | 1.39 |  |
| 2.00 | 1.50 | 91.33 | 1.37 | start injectiong N2 |
| 2.20 | 1.84 | 63.59 | 1.17 |  |
| 2.40 | 3.29 | 70.82 | 2.33 |  |
| 2.60 | 4.71 | 73.67 | 3.47 |  |
| 2.80 | 5.74 | 68.29 | 3.92 |  |
| 3.00 | 6.31 | 65.13 | 4.11 |  |
| 3.20 | 6.67 | 63.27 | 4.22 |  |
| 3.40 | 6.76 | 63.76 | 4.31 |  |
| 3.60 | 7.10 | 63.94 | 4.54 |  |
| 3.80 | 7.10 | 63.24 | 4.49 |  |
| 4.00 | 7.52 | 62.90 | 4.73 |  |
| 4.20 | 7.69 | 62.81 | 4.83 |  |
| 4.40 | 8.16 | 61.40 | 5.01 |  |
| 4.60 | 8.47 | 57.02 | 4.83 |  |
| 4.80 | 8.92 | 55.16 | 4.92 |  |
| 5.00 | 9.35 | 55.08 | 5.15 |  |
| 5.20 | 9.49 | 54.37 | 5.16 |  |
| 5.40 | 9.63 | 53.69 | 5.17 |  |
| 5.60 | 9.77 | 53.53 | 5.23 |  |
| 5.80 | 9.89 | 52.88 | 5.23 |  |
| 6.00 | 10.11 | 51.43 | 5.20 |  |
| 6.20 | 10.44 | 42.43 | 4.43 |  |
| 6.40 | 10.31 | 40.74 | 4.20 |  |
| 6.60 | 10.18 | 38.61 | 3.93 |  |
| 6.80 | 10.31 | 39.09 | 4.03 |  |
| 7.00 | 10.04 | 38.55 | 3.87 |  |
| 7.20 | 9.91 | 37.64 | 3.73 |  |
| 7.40 | 9.98 | 36.87 | 3.68 |  |
| 7.60 | 10.11 | 36.89 | 3.73 |  |
| 7.80 | 10.18 | 35.27 | 3.59 |  |
| 8.00 | 10.04 | 33.17 | 3.33 |  |

Spacing from the injection hole for 2.0m in bedding direction

| Time（h） | Mixed gas flow（L/min） | density（%） | fure gas flow（L/min） | Remarks |
| --- | --- | --- | --- | --- |
| 0.00 | 1.34 | 98.51 | 1.32 |  |
| 0.25 | 1.29 | 94.57 | 1.22 |  |
| 0.50 | 1.29 | 96.12 | 1.24 |  |
| 0.75 | 1.23 | 92.68 | 1.14 |  |
| 1.00 | 1.18 | 92.37 | 1.09 | start injectiong N2 |
| 1.25 | 1.18 | 88.98 | 1.05 |  |
| 1.50 | 1.15 | 86.96 | 1.00 |  |
| 1.75 | 1.10 | 90.91 | 1.00 |  |
| 2.00 | 1.00 | 100.00 | 1.00 |  |
| 2.25 | 1.20 | 83.33 | 1.00 |  |
| 2.50 | 1.27 | 78.74 | 1.00 |  |
| 2.75 | 1.47 | 61.90 | 0.91 |  |
| 3.00 | 1.65 | 64.85 | 1.07 |  |
| 3.25 | 1.65 | 66.06 | 1.09 |  |
| 3.50 | 2.01 | 70.15 | 1.41 |  |
| 3.75 | 2.66 | 68.42 | 1.82 |  |
| 4.00 | 3.25 | 59.69 | 1.94 |  |
| 4.25 | 3.79 | 69.66 | 2.64 |  |
| 4.50 | 4.29 | 74.13 | 3.18 |  |
| 4.75 | 4.76 | 75.00 | 3.57 |  |
| 5.00 | 4.99 | 74.75 | 3.73 |  |
| 5.25 | 5.21 | 66.99 | 3.49 |  |
| 5.50 | 5.43 | 64.27 | 3.49 |  |
| 5.75 | 5.84 | 62.33 | 3.64 |  |
| 6.00 | 6.04 | 61.42 | 3.71 |  |
| 6.25 | 6.24 | 61.54 | 3.84 |  |
| 6.50 | 6.43 | 61.90 | 3.98 |  |
| 6.75 | 6.43 | 60.19 | 3.87 |  |
| 7.00 | 6.81 | 58.15 | 3.96 |  |
| 7.25 | 6.99 | 55.22 | 3.86 |  |
| 7.50 | 7.52 | 52.93 | 3.98 |  |
| 7.75 | 8.35 | 53.89 | 4.50 |  |
| 8.00 | 9.35 | 52.41 | 4.90 |  |
| 8.25 | 9.15 | 57.92 | 5.30 |  |
| 8.50 | 9.35 | 54.65 | 5.11 |  |
| 8.75 | 9.27 | 52.64 | 4.88 |  |
| 9.00 | 9.20 | 51.41 | 4.73 |  |
| 9.25 | 9.35 | 48.88 | 4.57 |  |
| 9.50 | 9.27 | 47.68 | 4.42 |  |
| 9.75 | 9.20 | 46.96 | 4.32 |  |
| 10.00 | 9.12 | 46.60 | 4.25 |  |

Spacing from the injection hole for 3.0m in bedding direction

| Time（h） | Mixed gas flow（L/min） | density（%） | fure gas flow（L/min） | Remarks |
| --- | --- | --- | --- | --- |
| 0.00 | 2.60 |  |  |  |
| 0.25 | 1.80 |  |  |  |
| 0.50 | 1.00 |  |  |  |
| 0.75 | 0.50 |  |  |  |
| 1.00 | 0.10 |  |  |  |
| 1.25 | 0.00 |  |  |  |
| 1.50 | 0.00 |  |  |  |
| 1.75 | 0.00 |  |  |  |
| 2.00 | 0.00 |  |  |  |
| 2.25 | 0.00 |  |  |  |
| 2.50 | 0.00 |  |  |  |
| 2.75 | 0.00 |  |  |  |
| 3.00 | 0.00 |  |  |  |
| 3.25 | 0.00 |  |  |  |
| 3.50 | 0.00 |  |  |  |
| 3.75 | 0.00 |  |  |  |
| 4.00 | 0.00 |  |  |  |
| 4.25 | 0.00 |  |  |  |
| 4.50 | 0.00 |  |  |  |
| 4.75 | 0.00 |  |  |  |
| 5.00 | 0.00 |  |  |  |
| 5.25 | 0.00 |  |  |  |
| 5.50 | 0.00 |  |  |  |
| 5.75 | 0.00 |  |  |  |
| 10.00 | 0.00 |  |  |  |
| 18.00 | 0.00 |  |  |  |
| 36.00 | 0.00 |  |  |  |
| 44.00 | 0.00 |  |  |  |
| 52.00 | 0.00 |  |  |  |
| 60.00 | 0.00 |  |  |  |
| 68.00 | 0.00 |  |  |  |
| 76.00 | 0.00 |  |  |  |
